# Supplementary material for: Transcriptome-Based WGCNA Analysis Reveals the Mechanism of Drought Resistance Differences in Sweetpotato (Ipomoea batatas (L.) Lam.)
Source: MDPI journal article supplement (doi:10.3390/ijms241814398), 2023-09-21
Supplement: s1 [file s1]

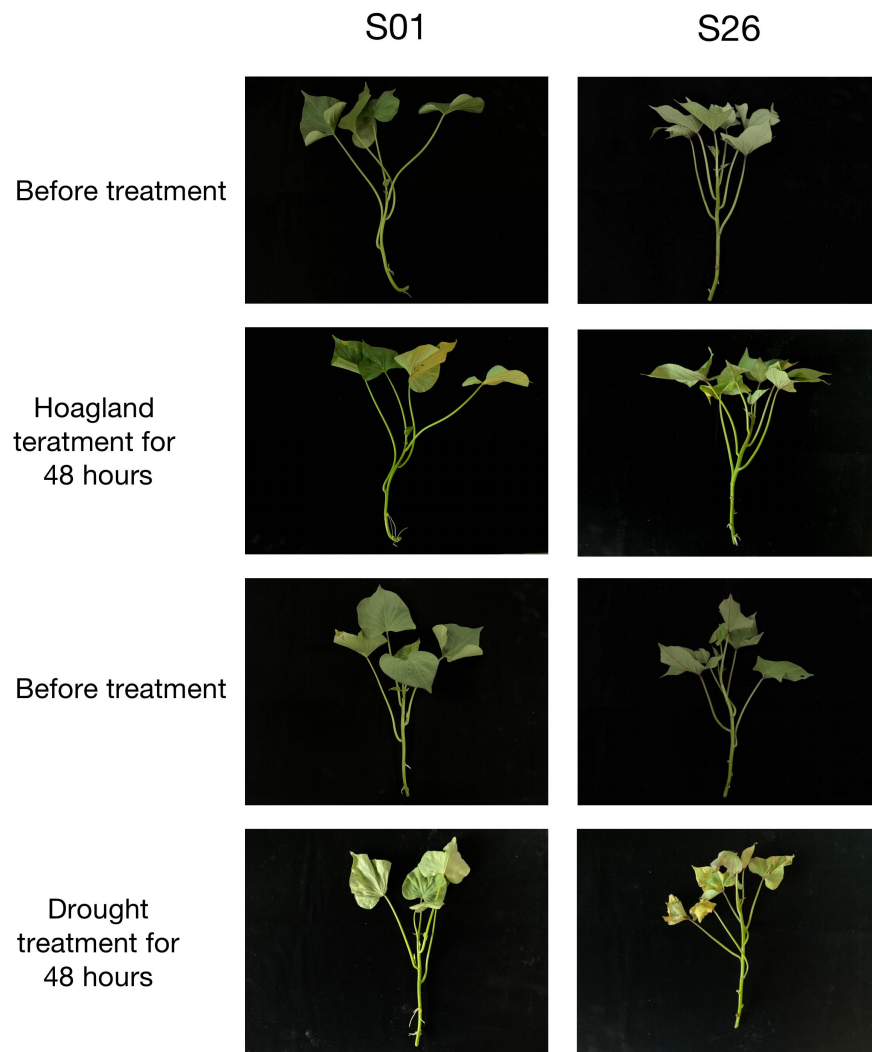

**Figure S1.** Phenotype changes of S01 and S26 drought treatment groups and control groups

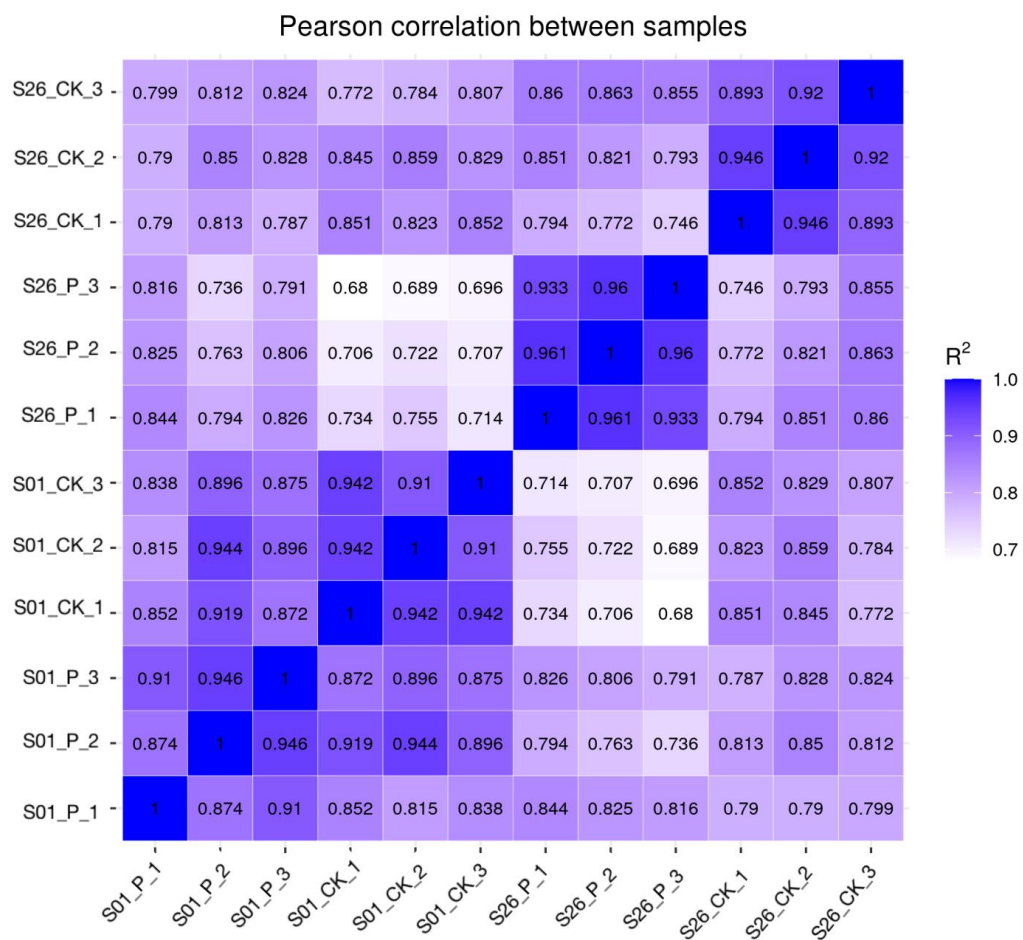

**Figure S2.** Correlation analysis of sample gene expression levels



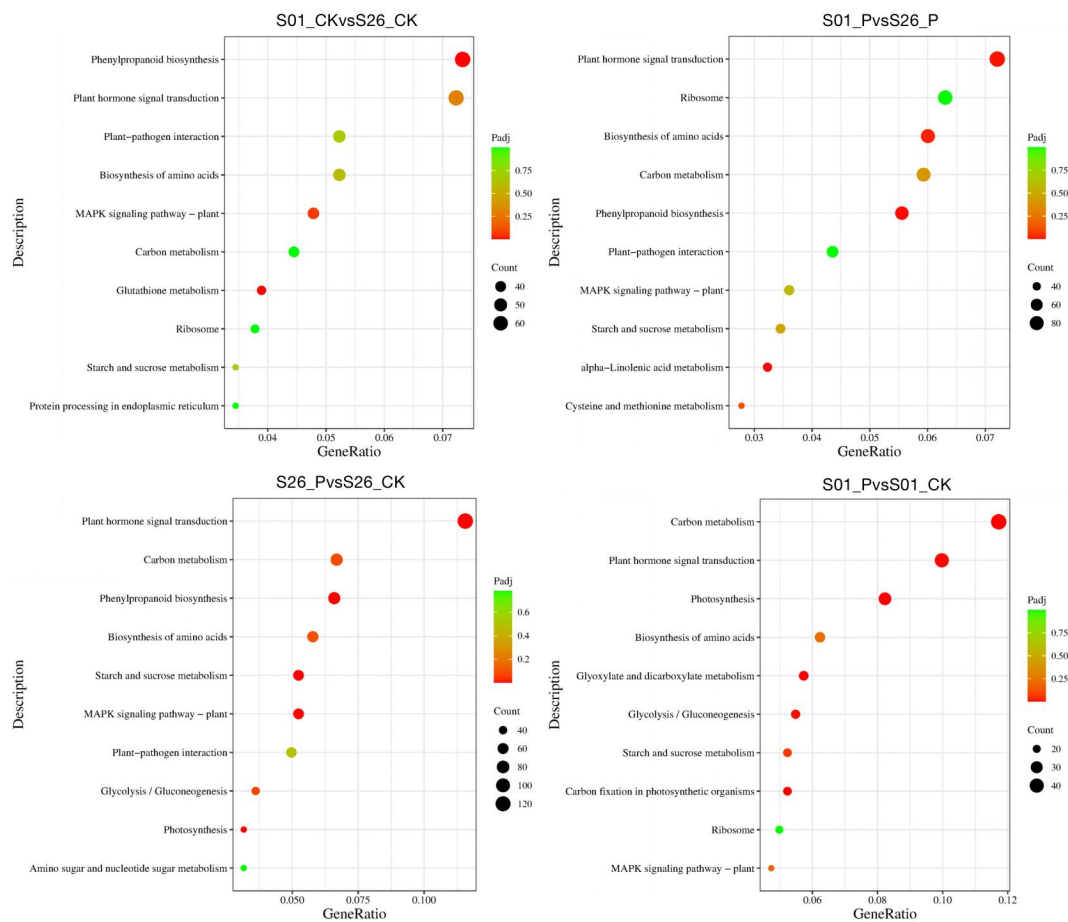

**Figure S4.** KEGG metabolic pathway analysis of DEGs. The size of the circles represents the number of genes annotated to this pathway

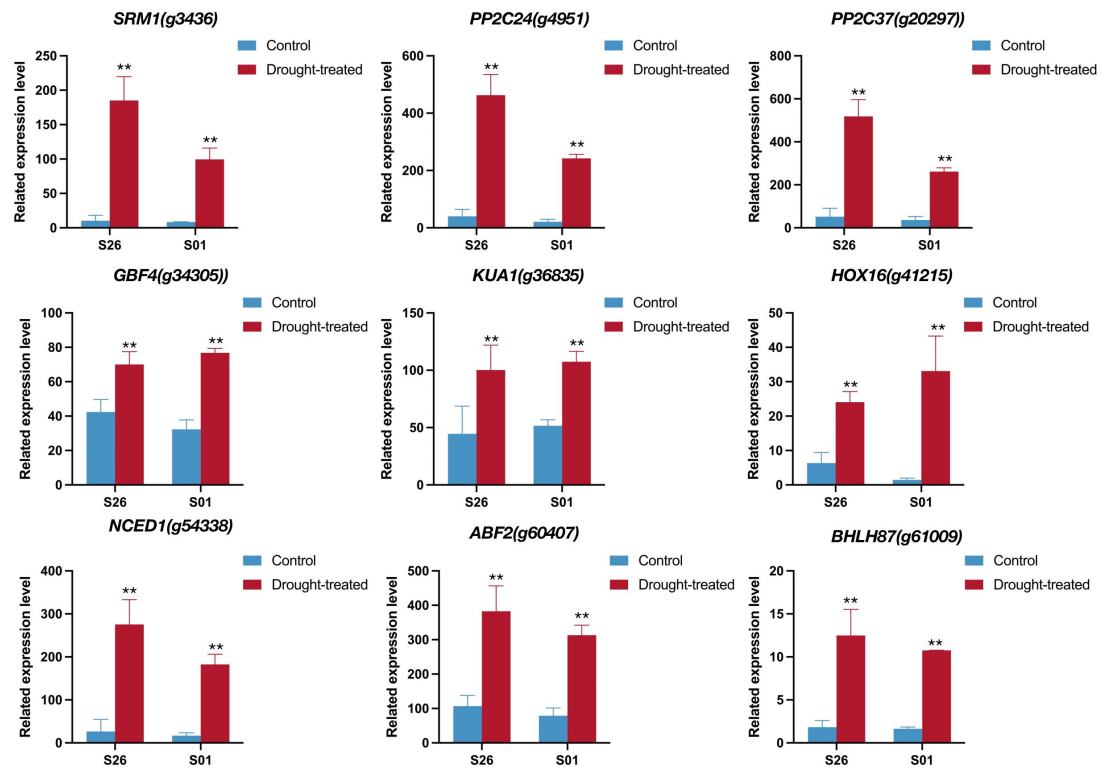

**Figure S5.** RNA seq data gene expression levels. \*\* indicates that the different physiological index between control group and experimental group was significant at  $P$  value  $< 0.01$ .

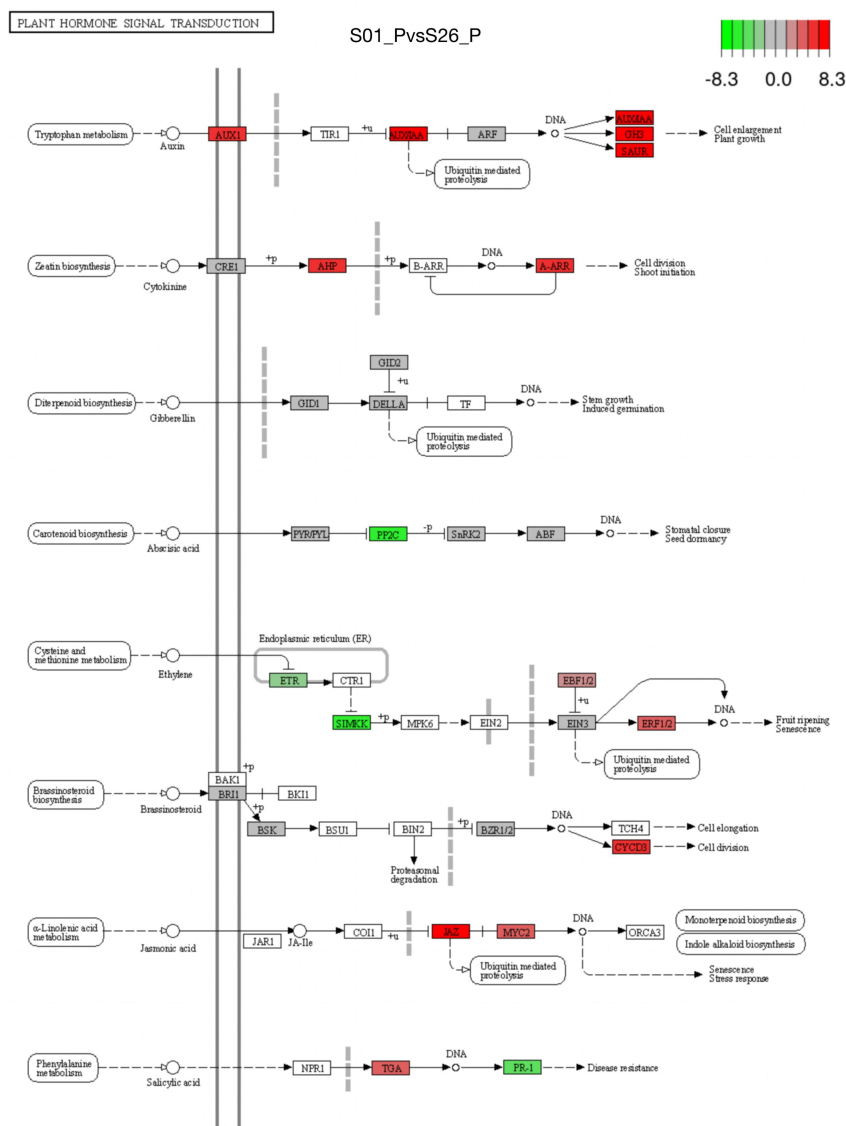

**Figure S6.** Plant hormone conduction pathway diagram
