# Supplementary material for: Transcriptome-Based WGCNA Analysis Reveals the Mechanism of Drought Resistance Differences in Sweetpotato (Ipomoea batatas (L.) Lam.)
Source: Int J Mol Sci. 2023 Sep 21;24(18):14398. doi: 10.3390/ijms241814398 (PMC10531967; doi:10.3390/ijms241814398)
Supplement: Supplementary file 1 [file ijms-24-14398-s001.zip › Table S1.xlsx]

## Sheet: Table S1
Table S1 27 genotypes of sweetpotato in present paper
Number	Genotype	Type*	Resource	Hybridized combination
S01	XS161819	1	Southwest University,Chongqing,China	Laissez-faire pollination by Yushu-35 as female parent
S02	XN1729-11	2	Southwest University,Chongqing,China	Laissez-faire pollination by Xuyushu-34 as female parent
S03	Wan1802-36	2	Chongqing Three Gorges Academy of Agricultural Sciences, Wanzhou,China	Laissez-faire pollination by 12-1-39 as female parent
S04	Mianshu-6	1	Mianyang Academy of Agricultural Sciences, Mianyang,China	Xushu 18 × 83-1229
S05	21-F-3	3	Southwest University,Chongqing,China	Laissez-faire pollination by Fushu 7-6 as female parent
S06	18-2-57	1	Southwest University,Chongqing,China	Laissez-faire pollination by Zheshu-13 as female parent
S07	Jinshu-3	2	Shanxi Academy of Agricultural Sciences, Shanxi,China	Gaoxi 14 × mixture pollen from Huangjinqianguan and Guandong-889
S08	G20-9	4	Guangdong Academy of Agricultural Sciences,Guangzhou/Southwest University,Chongqing,China	Group hybridization by Yuzishu-7 as female parent
S09	Fucaishu-20	3	Fujian Academy of Agricultural Sciences,Fuzhou,,China	Fushu 7-6 × Quanshu-830
S10	21-P-29	3	Southwest University,Chongqing,China	Laissez-faire pollination by Pushu-53 as female parent
S11	173306	2	Southwest University,Chongqing,China	Group hybridization by QJ15-14-4 as female paren
S12	21-F-33	3	Southwest University,Chongqing,China	Laissez-faire pollination by Fushu 7-6 as female paren
S13	21-F-58	3	Southwest University,Chongqing,China	Laissez-faire pollination by Fushu 7-6 as female paren
S14	XS190409	3	Southwest University,Chongqing,China	Yanzishu-337 × Yushu-19
S15	Xushu-22	1	Xuzhou Academy of Agricultural Sciences, Xuzhou,China	Yushu-7 × Sushu-7
S16	Wan1915-17	2	Chongqing Three Gorges Academy of Agricultural Sciences, Wanzhou,China	Group hybridization by Xushu-22 as female parent
S17	21-F-14	3	Southwest University,Chongqing,China	Laissez-faire pollination by Fushu 7-6 as female parent
S18	21-F-9	3	Southwest University,Chongqing,China	Laissez-faire pollination by Fushu 7-6 as female parent
S19	Longshu-10	2	Longyan Institute of Agricultural Science	Yanfen-1 × Jinshan-57
S20	Jishu-25	1	Shandong Academy of Agricultural Sciences,Jinan,,China	Laissez-faire pollination by Jishu-01028 as female paren
S21	QJW-1	1	Southwest University,Chongqing,China	Unknown because of seeds from accidental mixing
S22	18-5-8	2	Southwest University,Chongqing,China	Group hybridization by 15-10-5 as female parent
S23	18-2-44	2	Southwest University,Chongqing,China	Laissez-faire pollination by Zheshu-3 as female parent
S24	170407	2	Southwest University,Chongqing,China	Group hybridization by 15-2-14 as female parent
S25	21-P-26	3	Southwest University,Chongqing,China	Laissez-faire pollination by Pushu-53 as female parent
S26	18-12-3	1	Southwest University,Chongqing,China	Laissez-faire pollination by Zheshu-3 as female parent
S27	Chaoshu-1	5	Chaoyang County Agricultural Research Institute,Guangdong,China	Selected from posterity of natural crosses of Qingxin Shalaoyue
*Genotype type 1,2,3,4,5 were storage root for starch-processing, storage root for eating consuming, vine-tip for eating consuming, storage root with purple fleshed,and forage using,respectively.
