# Supplementary material for: Transcriptome-Based WGCNA Analysis Reveals the Mechanism of Drought Resistance Differences in Sweetpotato (Ipomoea batatas (L.) Lam.)
Source: Int J Mol Sci. 2023 Sep 21;24(18):14398. doi: 10.3390/ijms241814398 (PMC10531967; doi:10.3390/ijms241814398)
Supplement: Supplementary file 1 [file ijms-24-14398-s001.zip › Table S2.xlsx]

## Sheet: Table S2
Table S2 qRT-PCR primers design
Name of primers	Forward primers	Reverse primers	Product size（bp）
g3436	GCCGTGGATACTAAGACAG	TTGGGTTGGGAAAGTTGCA	182
g4951	ATGCGTCGATGCTATTGAC	GATCATCATCAGACGACACG	190
g20297	CATAGCACCGATAACGTTAG	GGCTCTATACAGTTATTAAGCC	215
g34305	TCCACACAACAATGACACC	AAGGGATGACATCATTGCC	205
g36835	TTAAGCTTAGGGGAATCGCT	ACACAGCTCATCACATCAC	193
g41215	AGCTTCCCAAAGCTTGAAG	TGTAGTGGCAACAGTGGT	190
g54338	GGTTACATCCTAGCCTTCGT	CCCACTGGTAAATCTCGTC	205
g60407	AGAACTACAGAAGAAACAGGC	CAGTGAGAACGCTCTGTTT	198
g61009	TCCCTCCATCTTTACCCTTC	TCGGTTGGGTTGAGTTTCA	186
