# Supplementary material for: Transcriptome-Based WGCNA Analysis Reveals the Mechanism of Drought Resistance Differences in Sweetpotato (Ipomoea batatas (L.) Lam.)
Source: Int J Mol Sci. 2023 Sep 21;24(18):14398. doi: 10.3390/ijms241814398 (PMC10531967; doi:10.3390/ijms241814398)
Supplement: Supplementary file 1 [file ijms-24-14398-s001.zip › Table S3.xlsx]

## Sheet: Table S3
Table S3 RWC, VTFWR, R of 27 genotypes of sweetpotato
Genotype	RWC(%)		VTFWR(%)		R(number)
S01	0.70±0.01	a	0.87±0.03	a	25.33±3.00	ab
S02	0.64±0.02	abc	0.85±0.02	abcd	25.00±3.06	ab
S03	0.57±0.04	cdef	0.84±0.04	abcde	23.67±2.89	abc
S04	0.60±0.05	bcde	0.85±0.07	abcd	23.33±3.00	abc
S05	0.58±0.02	cdef	0.82±0.02	bcdefg	23.00±10.26	abc
S06	0.58±0.01	cdef	0.78±0.06	fghi	22.67±5.51	abcd
S07	0.56±0.02	def	0.86±0.05	abc	22.33±2.00	abcd
S08	0.56±0.02	def	0.86±0.04	abc	22.00±2.08	abcd
S09	0.64±0.02	abc	0.83±0.04	abcdef	20.67±1.53	bcde
S10	0.67±0.02	ab	0.84±0.04	abcd	19.33±4.36	bcde
S11	0.57±0.01	cdef	0.81±0.04	cdefgh	18.00±1.15	cdefg
S12	0.59±0.01	cdef	0.80±0.04	defgh	16.33±2.31	defgh
S13	0.60±0.01	bcdef	0.86±0.06	ab	15.67±1.73	efgh
S14	0.59±0.02	cdef	0.82±0.02	abcdefg	15.00±2.00	efghi
S15	0.63±0.01	bcd	0.80±0.02	defgh	14.67±4.51	fghij
S16	0.53±0.03	efg	0.77±0.03	ghij	14.33±2.65	efghij
S17	0.44±0.06	ij	0.83±0.03	abcdef	13.67±1.53	fghijkl
S18	0.46±0.02	hij	0.78±0.04	fghi	13.33±1.53	fghijk
S19	0.44±0.02	ij	0.76±0.02	hijk	12.67±1.53	ghijkl
S20	0.52±0.04	fgh	0.77±0.08	ghij	11.33±1.53	hijkl
S21	0.49±0.03	ghi	0.74±0.05	ijk	8.67±1.53	ijkl
S22	0.57±0.04	cdef	0.79±0.04	efgh	8.33±3.06	jkl
S23	0.44±0.03	ij	0.72±0.03	klm	7.33±1.73	kl
S24	0.53±0.03	efg	0.72±0.01	klm	7.00±1.15	kl
S25	0.45±0.02	ij	0.69±0.03	lm	7.33±3.06	kl
S26	0.41±0.03	j	0.68±0.03	m	6.67±4.36	l
S27	0.60±0.03	bcdef	0.73±0.04	jkl	28.00±3.79	a
Note: Different lowercase letterswere indicated the differences physiological index between in the same column were significant at P value < 0.05.
