# Supplementary material for: Transcriptome-Based WGCNA Analysis Reveals the Mechanism of Drought Resistance Differences in Sweetpotato (Ipomoea batatas (L.) Lam.)
Source: Int J Mol Sci. 2023 Sep 21;24(18):14398. doi: 10.3390/ijms241814398 (PMC10531967; doi:10.3390/ijms241814398)
Supplement: Supplementary file 1 [file ijms-24-14398-s001.zip › Table S4.xlsx]

## Sheet: Table S4
Table S4 Clean reads data quality summary
sample	library	raw_reads	raw_bases	clean_reads	clean_bases	error_rate	Q20
S26_P_1	FRAS220311621-1r	45630020	6.84G	43708368	6.56G	0.03	96.4
S26_P_2	FRAS220311622-1r	45697984	6.85G	44022646	6.60G	0.03	96.63
S26_P_3	FRAS220311623-1r	46197842	6.93G	44304390	6.65G	0.03	96.45
S26_CK_1	FRAS220311624-1r	46128334	6.92G	44364246	6.65G	0.03	96.6
S26_CK_2	FRAS220311625-1r	45178684	6.78G	42887360	6.43G	0.03	96.51
S26_CK_3	FRAS220311626-1r	46109276	6.92G	42728500	6.41G	0.03	96.84
S82_P_1	FRAS220311615-1r	46511740	6.98G	44448986	6.67G	0.03	96.46
S82_P_2	FRAS220311616-1r	46646052	7.00G	44365884	6.65G	0.03	96.58
S82_P_3	FRAS220311617-1r	45497916	6.82G	43527952	6.53G	0.03	96.88
S82_CK_1	FRAS220311618-1r	45369830	6.81G	43785050	6.57G	0.03	96.6
S82_CK_2	FRAS220311619-1r	45633960	6.85G	43834346	6.58G	0.03	96.77
S82_CK_3	FRAS220311620-1r	42916022	6.44G	41056516	6.16G	0.03	96.64
