# Supplementary material for: Transcriptome-Based WGCNA Analysis Reveals the Mechanism of Drought Resistance Differences in Sweetpotato (Ipomoea batatas (L.) Lam.)
Source: Int J Mol Sci. 2023 Sep 21;24(18):14398. doi: 10.3390/ijms241814398 (PMC10531967; doi:10.3390/ijms241814398)
Supplement: Supplementary file 1 [file ijms-24-14398-s001.zip › Table S5.xlsx]

## Sheet: Sheet1
Table S5 Hub Gene Information
Module	Gene number	Connectivity	Categories	Functional annotation
blue	g20743	620.11	At1g64890	Probable folate-biopterin transporter 7
	g14296	502.84	CDKF	Cyclin-dependent kinase F-4
	g33417	497.86	AIRP2	Cold-regulated 413 plasma membrane protein
	g57974	484.93	SYT3	Synaptotagmin-3
	novel.677	481.57	-	-
	g56860	367.22	CPRF1	Common plant regulatory factor 1
	g9026	209.92	LOC116016589	-
	g50956	175.74	CIPK3	CBL-interacting serine/threonine-protein kinase 3
	g60091	173.5	SPBC2A9	Uncharacterized WD repeat-containing protein
	novel.244	162.48	-	-
	g49825	160	LOC116024576	-
	g38080	159.88	PVA22	Vesicle-associated protein 2-2
	g24220	148.81	IP5P8	Type I inositol polyphosphate 5-phosphatase 8
	g29120	141.59	WAV3	E3 ubiquitin-protein ligase WAV3
	g54083	116.39	HSP21.7	21.7 kDa class VI heat shock protein
	g47370	110.65	AFP2	Ninja-family protein
	g26328	98.8	LOC116016589	-
	g50524	82.17	LOC116003084	-
	g53123	77.36	SRG1	Protein SRG1
	g24621	62.42	LURP1	The LOR (LURP-one related) family
